# Supplementary material
Source: Springer Nature journal article supplement (https://www.springermedizin.de/resource/supplementary/12950_2014_366_MOESM3_ESM.pdf/9557670)

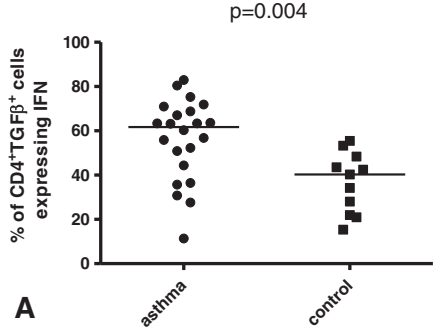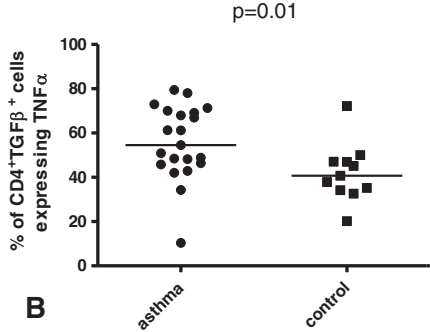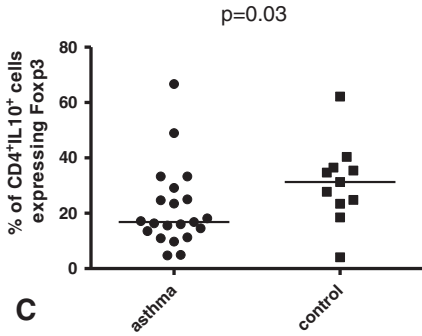

Supplement: MOESM3 [file 9557670]
